# Supplementary material for: Longitudinal Study of the Distribution of Antimicrobial-Resistant Campylobacter Isolates from an Integrated Broiler Chicken Operation
Source: MDPI journal article supplement (doi:10.3390/ani11020246), 2021-01-20
Supplement: s1 [file s1]

**SUPPL. Table S1.** Types and number of samples collected throughout the chicken production chain.

| Production Stage | Time Point |        |        | Before Pooling         |                                        | After Pooling                         |                  |
|------------------|------------|--------|--------|------------------------|----------------------------------------|---------------------------------------|------------------|
|                  |            |        |        | No. of Original Sample | Sample Origin (no. of Pooling Samples) | Sample Origin (no. of Pooled Samples) | Total n/(%)      |
| Breeder farm     | 28 - 65wks |        |        | 550                    | Cloaca swab (5)                        | Cloaca swab (110)                     | 110/176 (62.5%)  |
|                  |            |        |        | 198                    | Litter (3)                             | Litter (66)                           | 66/176 (37.5%)   |
| Hatchery         | 1-day-old  |        |        | 825                    | Cloaca swab (5)                        | Cloaca swab (165)                     | 165/165 (100.0%) |
| Broiler farm     | 1-day      | 15-day | 25-day | 1500                   | Cloaca swab (5)                        | Cloaca swab (300)                     | 300/720 (41.7%)  |
|                  |            |        |        | 540                    | Litter (3)                             | Litter (180)                          | 180/720 (25.0%)  |
|                  |            |        |        | 240                    | Feed (2)                               | Feed (120)                            | 120/720 (16.7%)  |
|                  |            |        |        | 240                    | Drinking water (2)                     | Drinking water (120)                  | 120/720 (16.7%)  |
| Slaughterhouse   | -          |        |        | 250                    | Cloaca swab (5)                        | Cloaca swab (50)                      | 50/230 (21.7%)   |
|                  |            |        |        | 540                    | Environment (3)                        | Environment (180)                     | 180/230 (78.3%)  |
| Retail shop      | -          |        |        | -                      | Meat (-)                               | -                                     | 57 (100.0%)      |
| - Not applicable |            |        |        |                        |                                        |                                       |                  |
